# Supplementary material for: High expression of interleukin-enhancer binding factor 3 predicts poor prognosis in patients with lung adenocarcinoma
Source: PubMed Central journal article supplement — Oncol Lett. 2020 Jan 22;19(3):2141–52. doi: 10.3892/ol.2020.11330 (PMC7039148; doi:10.3892/ol.2020.11330), 2020-01-22

Figure S1. Decision curve analyses for overall survival time prediction. The green and black lines represent the assumptions that all patients survive and that no patient will succumb, respectively. The blue and red lines represent the net benefit of the model based on the TNM stage and the model based on the TNM stage and ILF3 expression, respectively. TNM, tumor-node-metastasis; ILF3, interleukin-enhancer binding factor 3.

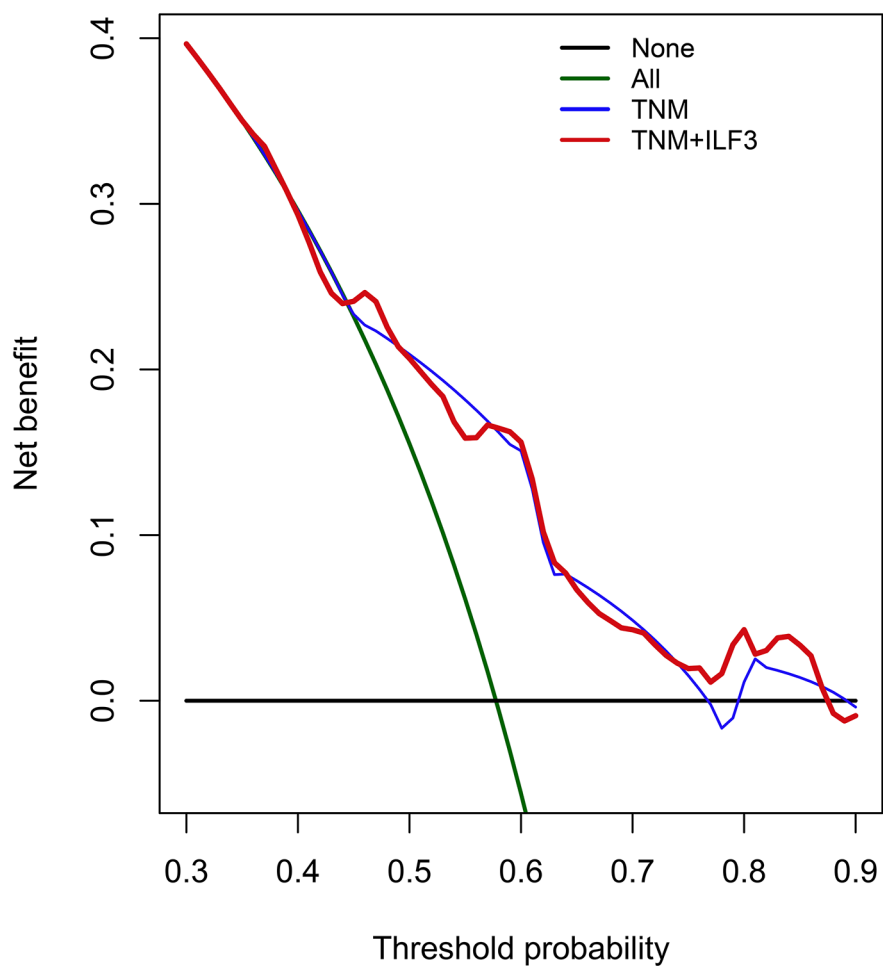

Supplement: Supplementary_Data.pdf [file Supplementary_Data.pdf]
